# Supplementary material for: The RNAi Mechanism Regulates a New Exonuclease Gene Involved in the Virulence of Mucorales
Source: MDPI journal article supplement (doi:10.3390/ijms22052282), 2021-02-25
Supplement: s1 [file s1]

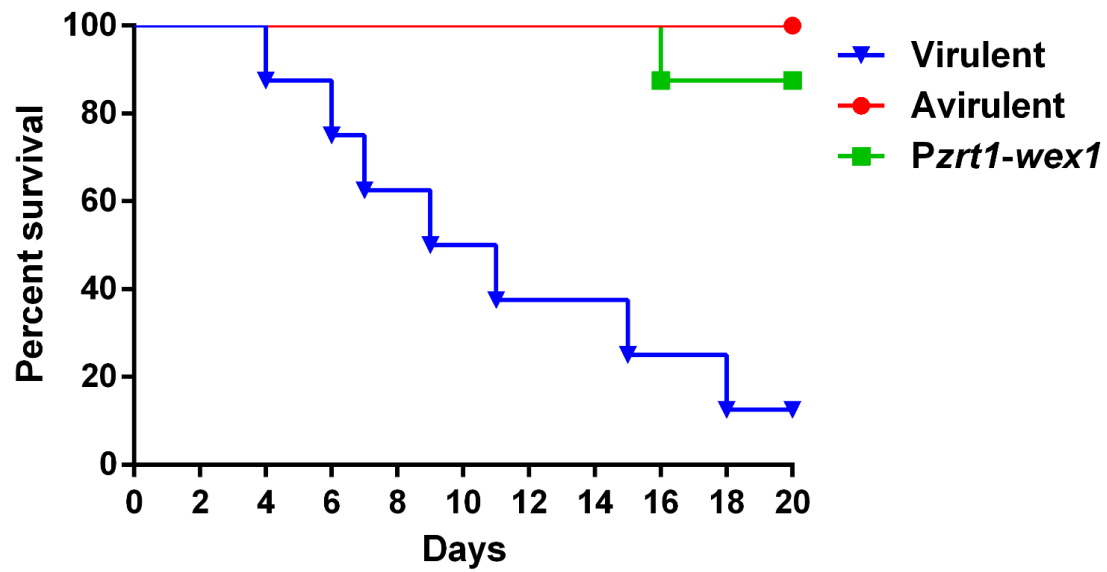

**Figure S1.** Second virulence assay testing the virulence of an independent mutant (MU638) overexpressing *wex1*. Mice were injected with  $1 \times 10^6$  spores of the *Pzrt1-wex1* (green, MU638) mutant, the Vi pathotype (blue), and the Av pathotype (red). The survival rate of the mutant MU638 was compared to the Vi control strain and statistically analyzed by a Mantel-Cox test.
